# Supplementary material for: Group 3-centred dehydrocoupling of Me2NH·BH3
Source: Royal Society of Chemistry journal article supplement (doi:10.1039/c0cc02810j), 2010-01-01
Supplement: c0cc02810j.pdf [file c0cc02810j.pdf]

## Supporting Information for

### Group 3-centred Dehydrocoupling of Me<sub>2</sub>NH.BH<sub>3</sub>

---

Michael S. Hill,\* Gabriele Kociok-Köhn and Thomas P. Robinson

Department of Chemistry, University of Bath

Claverton Down, Bath, BA2 7AY (UK)

E-mail: [m.s.hill@bath.ac.uk](mailto:m.s.hill@bath.ac.uk)

---

#### **General Experimental Procedures**

All manipulations were carried out using standard Schlenk line and glovebox techniques under an inert atmosphere of either nitrogen or argon. NMR experiments were conducted in Youngs tap NMR tubes made up and sealed in a Glovebox. NMR were collected on a Bruker AV300 spectrometer operating at 75.5 MHz (<sup>13</sup>C), 96.3 MHz (<sup>11</sup>B). Variable temperature <sup>1</sup>H NMR data were recorded on a Bruker AV400 spectrometer. The spectra were referenced relative to residual solvent resonances or an external BF<sub>3</sub>.OEt<sub>2</sub> standard (<sup>11</sup>B). Solvents (Toluene, THF, Hexane) were dried by passage through a commercially available (Innovative Technologies) solvent purification system, under nitrogen and stored in ampoules over molecular sieves. C<sub>6</sub>D<sub>6</sub> and d<sub>8</sub>-toluene were purchased from Goss Scientific Instruments Ltd. and dried over molten potassium before distilling under nitrogen and storing over molecular sieves. [Y{N(SiMe<sub>3</sub>)<sub>2</sub>}<sub>3</sub>] and [Sc{N(SiHMe<sub>2</sub>)<sub>2</sub>}<sub>3</sub>(THF)<sub>2</sub>] were prepared by literature procedures.<sup>1,2</sup>

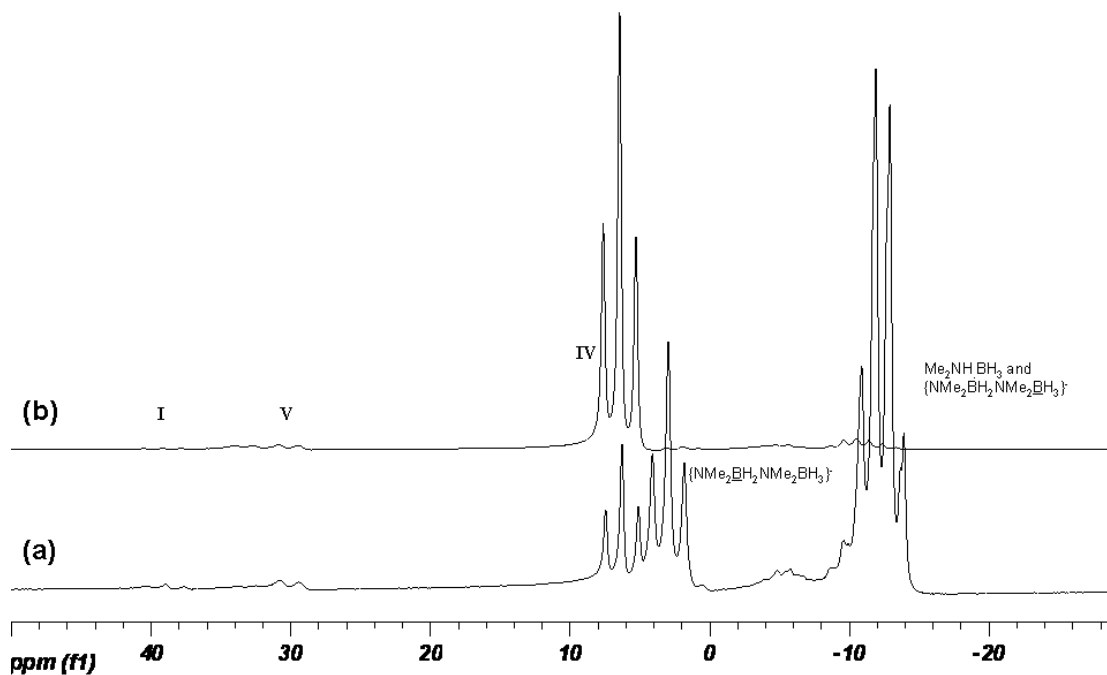

**Figure S1:**  $^{11}\text{B}$  NMR spectrum, with tentative assignments, of the Y-catalysed dehydrocoupling of  $\text{Me}_2\text{NH}\cdot\text{BH}_3$  after (a) 15 minutes at  $25\text{ }^\circ\text{C}$ ; (b) 12 hours at  $60\text{ }^\circ\text{C}$

### Synthesis of compound 1, $[\text{Sc}\{\text{NMe}_2\text{BH}_2\text{NMe}_2\text{BH}_3\}_2\{\text{N}(\text{SiHMe}_2)_2\}]$

A solution of  $[\text{Sc}\{\text{N}(\text{SiHMe}_2)_2\}_3(\text{THF})_2]$  (0.15 g, 0.28 mmol) in toluene (10 mL) was added at room temperature to a solution of  $\text{Me}_2\text{NHBH}_3$  (0.07 g, 1.1 mmol) in toluene (5 mL). After gas evolution had ceased, the solution was stirred overnight before *in vacuo* removal of volatiles. Crystallisation of the resultant colourless solid from the minimum amount of toluene (ca. 0.5 mL) at  $-30\text{ }^\circ\text{C}$  resulted in the isolation of compound 1 as colourless crystals suitable for an X-ray diffraction analysis (0.08 g, 70 %). Anal. Calc. for  $\text{C}_{12}\text{H}_{48}\text{B}_4\text{N}_5\text{ScSi}_2$ : C, 35.41; H, 11.91; N, 17.21. Found: C, 35.60; H, 11.74; N, 17.03.  $^1\text{H}\{^{11}\text{B}\}$  NMR ( $\text{C}_6\text{D}_6$ , 298 K)  $\delta = 0.25$  (br. s, 12H, SiMe), 2.10 (s, 12H,  $\text{CH}_3$ ), 2.43 (s, 12H,  $\text{CH}_3$ ).  $^{13}\text{C}\{^1\text{H}\}$  NMR ( $\text{C}_6\text{D}_6$ , 298 K)  $\delta = 0.9$  (SiMe), 43.9 (NCH<sub>3</sub>), 49.8 (NCH<sub>3</sub>).  $^{11}\text{B}$  NMR ( $\text{C}_6\text{D}_6$ , 298 K)  $\delta = 4.0$  (t,  $^1J_{\text{HB}} = 104\text{ Hz}$ ,  $\text{BH}_2$ ),  $-2.9$  (q,  $^1J_{\text{HB}} = 90\text{ Hz}$ ,  $\text{BH}_3$ ).

- 1 D C. Bradley, J. S. Ghotra and J. Hart, *J. Chem. Soc., Dalton Trans.*, 1973, 1021.
- 2 R. Anwender, O. Runte, J. Eppinger, G. Gerstberger, E. Herdtweck and M. Spiegler, *J. Chem. Soc., Dalton Trans.*, 1998, 847.
